# Supplementary material
Source: ML conference proceedings conference paper supplement (https://proceedings.neurips.cc/paper_files/paper/2020/hash/bd4d08cd70f4be1982372107b3b448ef-Abstract.html)
Supplement: Supplementary file [file bd4d08cd70f4be1982372107b3b448ef-Supplemental.pdf]

# Supplementary Material

This document contains the proofs of the results presented in the paper: Robustness Analysis of Non-Convex Stochastic Gradient Descent using Biased Expectations.

**Proof of Proposition 2.** If  $s = 0$ , the result is trivial. Otherwise, we have  $\mu_s(X + Y) = \frac{1}{s} \ln \mathbb{E} [e^{s(X+Y)}] = \frac{1}{s} \ln (\mathbb{E} [e^{sX}] \mathbb{E} [e^{sY}]) = \mu_s(X) + \mu_s(Y)$ , where the second equality follows from the independence of  $e^{sX}$  and  $e^{sY}$ .

**Proof of Proposition 3.** First, note that  $\mu_s(X) = -\mu_{-s}(-X)$ , and thus 2 implies 1 (as  $-\text{ess sup}(-X) = \text{ess inf } X$ ). Moreover,  $L_p$ -norms of probability spaces are both non-decreasing and tend to the essential supremum (i.e.,  $p \mapsto \|Y\|_p$  is non-decreasing and  $\lim_{p \rightarrow +\infty} \|Y\|_p = \text{ess sup } Y$ ). Hence, using the alternative formulation  $\mu_s(X) = \ln \|e^X\|_s$ , we get that  $s \mapsto \mu_s(X)$  is non-decreasing, and  $\lim_{s \rightarrow +\infty} \mu_s(X) = \ln(\text{ess sup}(e^X)) = \text{ess sup } X$ . Finally, note that the function  $(s, x) \mapsto \phi_s(x) = \frac{e^{sx}-1}{s}$  is continuous. Let  $s_0, s_1 \in I_X$ , and  $s_0 < s < s_1$ . By definition of  $I_X$ ,  $\phi_{s_0}(X)$  and  $\phi_{s_1}(X)$  are integrable. Moreover,  $|\phi_s(X)| = \max\{-\phi_s(X), \phi_s(X)\} \leq \max\{-\phi_{s_0}(X), \phi_{s_1}(X)\} \leq -\phi_{s_0}(X) + \phi_{s_1}(X) \leq |\phi_{s_0}(X)| + |\phi_{s_1}(X)|$  by monotonicity of  $s \mapsto \phi_s(x)$ . As  $|\phi_{s_0}(X)| + |\phi_{s_1}(X)|$  is integrable and independent of  $s$ , dominated convergence implies continuity of  $\mathbb{E}[\phi_s(X)]$ , and thus of  $\mu_s(X)$ , in  $(s_1, s_2)$ .

**Proof of Proposition 4.** A simple rewriting of  $\mu_s(\mu_s(X|\mathcal{F}))$  leads to the desired result:  $\mu_s(\mu_s(X|\mathcal{F})) = \phi_s^{-1}(\mathbb{E}[\phi_s \circ \phi_s^{-1}(\mathbb{E}[\phi_s(X)|\mathcal{F}])]) = \phi_s^{-1}(\mathbb{E}[\mathbb{E}[\phi_s(X)|\mathcal{F}]]) = \phi_s^{-1}(\mathbb{E}[\phi_s(X)]) = \mu_s(X)$ .

**Proof of Proposition 5.** Eq. (3) follows from the Chernoff bound  $\mathbb{P}(X \geq a) \leq \mathbb{E}[e^{sX}] e^{-sa}$  for  $a = \mu_s(X) + x$ . Moreover, if  $X \geq 0$  a.s., using Markov's inequality on  $\phi_s(X) \geq 0$  a.s. gives,  $\forall x > 0$ ,

$$\mathbb{P}(X \geq x) \leq \frac{\phi_s(\mu_s(X))}{\phi_s(x)}. \quad (15)$$

When  $s < 0$ , we can further simplify Eq. (15) by using  $\phi_s(\mu_s(X)) \leq \mu_s(X)$  (as  $\phi_s$  is concave), and  $\phi_s(x) \geq \frac{x}{1-sx}$ , which concludes the proof.

**Proof of Theorem 8.** The result follows from standard analysis of non-convex gradient descent. More specifically, using the  $\beta$ -smoothness of  $f$ , we have

$$\begin{aligned} f(x_{t+1}) &\leq f(x_t) + \langle \nabla f(x_t), x_{t+1} - x_t \rangle + \frac{\beta}{2} \|x_{t+1} - x_t\|^2 \\ &\leq f(x_t) - \eta \langle \nabla f(x_t), G_t \rangle + \frac{\beta \eta^2}{2} \|G_t\|^2 \\ &\leq f(x_t) - \eta \|\nabla f(x_t)\|^2 - \eta \langle \nabla f(x_t), X_t \rangle + \frac{\beta \eta^2}{2} \|\nabla f(x_t) + X_t\|^2 \\ &\leq f(x_t) - \eta \left(1 - \frac{\beta \eta}{2}\right) \|\nabla f(x_t)\|^2 - \eta(1 - \beta \eta) \langle \nabla f(x_t), X_t \rangle + \frac{\beta \eta^2}{2} \|X_t\|^2 \end{aligned} \quad (16)$$

Rearranging Eq. (16) and summing over all times  $t \in \{0, T-1\}$  leads to

$$\eta \left(1 - \frac{\beta \eta}{2}\right) \sum_{t < T} \|\nabla f(x_t)\|^2 \leq \Delta - \eta(1 - \beta \eta) \sum_{t < T} \langle X_t, \nabla f(x_t) \rangle + \frac{\beta \eta^2}{2} \sum_{t < T} \|X_t\|^2, \quad (17)$$

where  $\Delta = f(x_0) - \min_{x \in \mathbb{R}^d} f(x)$ . Finally, using the assumption  $\eta \in (0, 1/\beta]$  we obtain  $\frac{\eta}{2} \leq \eta \left(1 - \frac{\beta \eta}{2}\right)$ , and thus dividing by  $\eta T/2$  gives that

$$\frac{1}{T} \sum_{t=1 \dots T} \|\nabla f(x_t)\|^2 \leq \frac{2\Delta}{\eta T} - \frac{2(1 - \beta \eta)}{T} \sum_{t < T} \langle X_t, \nabla f(x_t) \rangle + \frac{\beta \eta}{T} \sum_{t < T} \|X_t\|^2. \quad (18)$$

To conclude, we apply biased expectation to both sides of Eq. (18). As  $\langle X_t, \nabla f(x_t) \rangle$  and  $\|X_t\|^2$  are not independent, Proposition 2 does not apply. We thus use the following Lemma to decompose the error.

**Lemma 18.** *Let  $X, Y$  be two (possibly dependent) random variables and  $s \in \mathbb{R}$ . If  $s \geq 0$ , then  $\mu_s(X + Y) \leq \mu_{2s}(X) + \mu_{2s}(Y)$ . Otherwise,  $\mu_s(X + Y) \leq \mu_s(X) + \frac{\mathbb{E}[Y e^{sX}]}{\mathbb{E}[e^{sX}]}$ , whenever the right-hand sides are well-defined.*

*Proof.* For  $s > 0$ , applying the Cauchy-Schwartz inequality to  $e^{sX}$  and  $e^{sY}$  gives  $\mu_s(X + Y) = \frac{1}{s} \ln(\mathbb{E}[e^{sX} e^{sY}]) \leq \frac{1}{2s} \ln(\mathbb{E}[e^{2sX}] \mathbb{E}[e^{2sY}]) = \mu_{2s}(X) + \mu_{2s}(Y)$ . For  $s < 0$ , we obtain that  $\mu_s(X + Y) = \mu_s(X) + \frac{1}{s} \ln \mathbb{E}\left[e^{sY} \frac{e^{sX}}{\mathbb{E}[e^{sX}]}\right]$  by a direct rewriting. Now, introducing the random variable  $Y'$  with density  $\frac{e^{sx}}{\mathbb{E}[e^{sX}]}$  w.r.t. the probability measure of  $(X, Y)$  and using Jensen's inequality on the function  $x \mapsto \frac{1}{s} \ln(x)$ , we obtain that  $\frac{1}{s} \ln \mathbb{E}\left[e^{sY} \frac{e^{sX}}{\mathbb{E}[e^{sX}]}\right] = \frac{1}{s} \ln \mathbb{E}\left[e^{sY'}\right] \leq \mathbb{E}\left[\frac{1}{s} \ln e^{sY'}\right] = \mathbb{E}[Y'] = \mathbb{E}\left[Y \frac{e^{sX}}{\mathbb{E}[e^{sX}]}\right]$  which proves the result.  $\square$

Moreover, note that, for any  $a \in \mathbb{R}$ ,  $\mu_s(aX) = a\mu_{as}(X)$ . Then, using Proposition 2 to remove the deterministic error, we have

$$\begin{aligned} \mu_s\left(\frac{1}{T} \sum_{t=1 \dots T} \|\nabla f(x_t)\|^2\right) &\leq \mu_s\left(\frac{2\Delta}{\eta T} - \frac{2(1-\beta\eta)}{T} \sum_{t < T} \langle X_t, \nabla f(x_t) \rangle + \frac{\beta\eta}{T} \sum_{t < T} \|X_t\|^2\right) \\ &\leq \frac{2\Delta}{\eta T} + \mu_s\left(\sum_{t < T} A_t\right), \end{aligned} \quad (19)$$

where  $A_t = -\frac{2(1-\beta\eta)}{T} \langle X_t, \nabla f(x_t) \rangle + \frac{\beta\eta}{T} \|X_t\|^2$ . Using Lemma 18 with  $X = \frac{\beta\eta}{T} \|X_t\|^2$  and  $Y = -\frac{2(1-\beta\eta)}{T} \langle X_t, \nabla f(x_t) \rangle$ , we have  $\mu_s(A_t | \mathcal{F}_t) \leq \frac{2(1-\beta\eta)}{T} m_u + \frac{\beta\eta}{T} \sigma_v^2$ , where  $u, v$  are defined as in Theorem 8 and  $m_s, \sigma_s^2$  as in Assumption 6 and Assumption 7. Finally, we use Proposition 4 to bound the sums over iterations:

$$\begin{aligned} \mu_s\left(\sum_{t < T} A_t\right) &= \mu_s\left(\mu_s\left(\sum_{t < T} A_t \mid \mathcal{F}_{T-1}\right)\right) \\ &= \mu_s\left(\sum_{t < T-1} A_t + \mu_s(A_{T-1} \mid \mathcal{F}_{T-1})\right) \\ &\leq \mu_s\left(\sum_{t < T-1} A_t + \frac{2(1-\beta\eta)}{T} m_u + \frac{\beta\eta}{T} \sigma_v^2\right) \\ &= \mu_s\left(\sum_{t < T-1} A_t\right) + \frac{2(1-\beta\eta)}{T} m_u + \frac{\beta\eta}{T} \sigma_v^2 \\ &\leq 2(1-\beta\eta) m_u + \beta\eta \sigma_v^2, \end{aligned} \quad (20)$$

which concludes the proof.

In order to simplify our convergence rates, we will use the following lemma.

**Lemma 19.** *Let  $a, b, c, p > 0$  and  $f(x) = ax^p + b/x$ . Then, with  $x^* = \min\left\{\left(\frac{b}{pa}\right)^{\frac{1}{1+p}}, c\right\}$ , we have*

$$f(x^*) \leq (1+p^{-1})bc^{-1} + (1+p)p^{\frac{-p}{1+p}} a^{\frac{1}{1+p}} b^{\frac{p}{1+p}}. \quad (21)$$

*Proof.* When  $b < pac^{1+p}$ , we have  $x^* = \left(\frac{b}{pa}\right)^{\frac{1}{1+p}}$  and  $f(x^*) = \left(\frac{b}{pa}\right)^{\frac{1}{1+p}}$ . Otherwise, we have  $x^* = c$  and  $f(x^*) = ac^p + b/c \leq (1+p^{-1})b/c$ . Hence,  $f(x^*)$  is inferior to the sum of both terms.  $\square$

**Proof of Theorem 11.** First, note that all the r.v. are integrable since the variance of the noise is bounded. Hence, for all the considered r.v.  $X$ , we have  $\mu_0(X) = \mathbb{E}[X]$  (see Proposition 3), and Theorem 8 gives us that  $\mathbb{E}\left[(1/T) \cdot \sum_{t=1}^T \|\nabla f(x_t)\|^2\right] \leq \frac{2\Delta}{\eta T} + \beta\eta\sigma^2$  when  $s = 0$ . Minimizing the right-hand side term over  $\eta \in (0, 1/\beta]$  using Lemma 19 leads to the desired result.

**Proof of Theorem 12.** Using Proposition 3, we have  $\lim_{s \rightarrow +\infty} \mu_s(\|X_t\|^2 | \mathcal{F}_t) = \text{ess sup } \|X_t\|^2 \leq B^2$ . Theorem 8 with  $s \rightarrow +\infty$  and  $\eta = 1/\beta$  thus gives  $\text{ess sup}\left((1/T) \sum_{t=1}^T \|\nabla f(x_t)\|^2\right) \leq \frac{2\beta\Delta}{T} + B^2$ .

**Proof of Theorem 14.** By definition of sub-exponential r.v., we have,  $\forall s \in (0, 1/c]$ ,  $\mu_s(-\langle X_t, \nabla f(x_t) \rangle \mid \mathcal{F}_t) \leq a\sigma^2 s/2$  and  $\mu_s(\|X_t\|^2 \mid \mathcal{F}_t) \leq (1 + b/2c)\sigma^2$ . Using Proposition 5 and Theorem 8 we thus have,  $\forall x, s > 0$  such that  $u = \frac{4s}{T} \leq 1/c$  and  $v = \frac{2\beta\eta s}{T} \leq 1/c$ ,

$$\mathbb{P} \left( \frac{1}{T} \sum_{t=0}^{T-1} \|\nabla f(x_t)\|^2 \geq \frac{2\Delta}{\eta T} + 2(1 - \beta\eta)m_u + \beta\eta\sigma_v^2 + x \right) \leq e^{-sx}, \quad (22)$$

where  $m_u = a\sigma^2 u/2$  and  $\sigma_v^2 = (1 + b/2c)\sigma^2$ . Hence, if  $\eta \in (0, 1/\beta]$ , we have, with probability at least  $1 - \delta$ ,

$$\frac{1}{T} \sum_{t=1}^T \|\nabla f(x_t)\|^2 \leq \frac{2\Delta}{\eta T} + \frac{4a\sigma^2 s}{T} + (1 + b/2c)\beta\eta\sigma^2 + \frac{1}{s} \ln(1/\delta). \quad (23)$$

Optimizing over  $\eta$  and  $s$  gives  $\beta\eta = \min \left\{ \sqrt{\frac{2\beta\Delta}{(1+b/2c)T\sigma^2}}, 1 \right\}$  and  $\frac{4cs}{T} = \min \left\{ \sqrt{\frac{4c^2 \ln(1/\delta)}{a\sigma^2 T}}, 1 \right\}$ .

Using Lemma 19, Eq. (23) thus becomes

$$\frac{1}{T} \sum_{t=1}^T \|\nabla f(x_t)\|^2 \leq \frac{4\beta\Delta + 8c \ln(1/\delta)}{T} + \sqrt{\frac{8(1 + b/2c)\beta\Delta\sigma^2}{T}} + 4\sigma \sqrt{\frac{a \ln(1/\delta)}{T}}. \quad (24)$$

**Proof of Proposition 16.** Using the second concentration inequality of Proposition 5, we have,  $\forall x \geq \sqrt{c}$ ,

$$\mathbb{P}(\|X_t\| \geq x \mid \mathcal{F}_t) = \mathbb{P}(\|X_t\|^2 \geq x^2 \mid \mathcal{F}_t) \leq \frac{2\mu_{-1/x^2}(\|X_t\|^2 \mid \mathcal{F}_t)}{x^2} \leq 2ax^{-b}. \quad (25)$$

**Proof of Theorem 17.** We first bound the biased mean in both settings. If the noise is symmetric, then  $\mathbb{E} \left[ -\langle X_t, \nabla f(x_t) \rangle e^{s\|X_t\|^2} \mid \mathcal{F}_t \right] = 0$  and, for  $s > 0$ ,  $m_{-s} = 0$  verifies Assumption 7. Otherwise, we use the following Lemma.

**Lemma 20.** *If  $f$  is  $L$ -Lipschitz and Assumption 15 is verified, then,  $\forall s \in [0, 1/c]$ ,*

$$\frac{\mathbb{E} \left[ -\langle X_t, \nabla f(x_t) \rangle e^{-s\|X_t\|^2} \mid \mathcal{F}_t \right]}{\mathbb{E} \left[ e^{-s\|X_t\|^2} \mid \mathcal{F}_t \right]} \leq \kappa_6 L s^{\frac{b-1}{2}}, \quad (26)$$

where  $\kappa_6 = (1 - ac^{-b/2})^{-1} \left( c^{\frac{b}{2}} + \frac{4ab}{(b-1)(3-b)} \right)$ .

*Proof.* First, we have

$$\begin{aligned} \mathbb{E} \left[ e^{-s\|X_t\|^2} \mid \mathcal{F}_t \right] &= e^{-s\mu_{-s}(\|X_t\|^2 \mid \mathcal{F}_t)} \\ &\geq 1 - s\mu_{-s}(\|X_t\|^2 \mid \mathcal{F}_t) \\ &\geq 1 - as^{b/2} \\ &\geq 1 - ac^{-b/2}. \end{aligned} \quad (27)$$

Then, let  $Y = -\langle X_t, \nabla f(x_t) \rangle$ . As  $\mathbb{E}[Y \mid \mathcal{F}_t] = 0$ , we have

$$\begin{aligned} \mathbb{E} \left[ Y e^{-s\|X_t\|^2} \mid \mathcal{F}_t \right] &= \mathbb{E} \left[ Y_+ e^{-s\|X_t\|^2} \mid \mathcal{F}_t \right] - \mathbb{E} \left[ Y_- e^{-s\|X_t\|^2} \mid \mathcal{F}_t \right] \\ &\leq \mathbb{E} \left[ Y_+ \mid \mathcal{F}_t \right] - \mathbb{E} \left[ Y_- e^{-s\|X_t\|^2} \mid \mathcal{F}_t \right] \\ &= \mathbb{E} \left[ Y_- \left( 1 - e^{-s\|X_t\|^2} \right) \mid \mathcal{F}_t \right] \\ &\leq L \mathbb{E} \left[ \|X_t\| \left( 1 - e^{-s\|X_t\|^2} \right) \mid \mathcal{F}_t \right], \end{aligned} \quad (28)$$

as  $Y_- \leq |\langle X_t, \nabla f(x_t) \rangle| \leq L \|X_t\|$ . Finally, we bound  $\mathbb{E} \left[ \|X_t\| \left( 1 - e^{-s \|X_t\|^2} \right) \mid \mathcal{F}_t \right]$  by using the function  $g(x) = x \left( 1 - e^{-sx^2} \right)$ . As  $g$  is monotonically increasing, we have

$$\begin{aligned}
\mathbb{E} \left[ \|X_t\| \left( 1 - e^{-s \|X_t\|^2} \right) \mid \mathcal{F}_t \right] &= \mathbb{E} [g(\|X_t\|)] \\
&= \int_0^{+\infty} \mathbb{P}(g(X) > x) dx \\
&= \int_0^{+\infty} \mathbb{P}(X > g^{-1}(x)) dx \\
&= \int_0^{g(\sqrt{c})} \mathbb{P}(X > g^{-1}(x)) dx + \int_{g(\sqrt{c})}^{+\infty} \mathbb{P}(X > g^{-1}(x)) dx \\
&\leq g(\sqrt{c}) + 2a \int_0^{+\infty} (g^{-1}(x))^{-b} dx \\
&\leq sc^{3/2} + 2a \int_0^{+\infty} \min \{x, (x/s)^{1/3}\}^{-b} dx \\
&\leq sc^{3/2} + \frac{4ab}{(b-1)(3-b)} s^{\frac{b-1}{2}} \\
&\leq \left( c^{\frac{b}{2}} + \frac{4ab}{(b-1)(3-b)} \right) s^{\frac{b-1}{2}}, \tag{29}
\end{aligned}$$

where the second inequality comes from  $g(x) \leq sx^3$  and  $g(x) \geq \min \{x, (x/s)^{1/3}\}$ , and the last inequality from  $s \leq 1/c$ .  $\square$

Hence, we can use  $m_{-s} = \kappa_6 L s^{\frac{b-1}{2}}$ , with the special case  $L = 0$  if  $X_t$  is symmetric, in order to describe both settings. Using Theorem 8 and Assumption 15, we thus have, for  $s \in \left[ 0, \frac{T}{\beta \eta c} \right]$ ,

$$\mu_{-s} \left( \frac{1}{T} \sum_{t=1}^T \|\nabla f(x_t)\|^2 \right) \leq \frac{2\Delta}{\eta T} + \beta \eta a \left( \frac{\beta \eta s}{T} \right)^{\frac{b-2}{2}} + \kappa_6 L \left( \frac{\beta \eta s}{T} \right)^{\frac{b-1}{2}}. \tag{30}$$

We obtain a concentration inequality using Proposition 5, leading to,  $\forall x > 0$ ,

$$\mathbb{P} \left( \frac{1}{T} \sum_{t=1}^T \|\nabla f(x_t)\|^2 \geq x \right) \leq \frac{1+sx}{x} \left[ \frac{2\Delta}{\eta T} + \beta \eta a \left( \frac{\beta \eta s}{T} \right)^{\frac{b-2}{2}} + \kappa_6 L \left( \frac{\beta \eta s}{T} \right)^{\frac{b-1}{2}} \right]. \tag{31}$$

Choosing  $s = \min \left\{ \frac{1}{x}, \frac{T}{\beta \eta c} \right\}$  gives  $\frac{1+sx}{x} \leq \frac{2}{x}$ ,  $\left( \frac{\beta \eta s}{T} \right)^{\frac{b-1}{2}} \leq \left( \frac{\beta \eta}{Tx} \right)^{\frac{b-1}{2}}$  (as  $b \geq 1$ ) and  $\left( \frac{\beta \eta s}{T} \right)^{\frac{b-2}{2}} \leq \left( \frac{\beta \eta}{Tx} \right)^{\frac{b-2}{2}} + c^{\frac{2-b}{2}}$ . Hence, with  $y = \frac{\beta \eta}{Tx}$ , we have

$$\mathbb{P} \left( \frac{1}{T} \sum_{t=1}^T \|\nabla f(x_t)\|^2 \geq x \right) \leq \frac{2}{x} \left[ \frac{2\beta\Delta}{T^2 xy} + aTxy^{\frac{b}{2}} + ac^{\frac{2-b}{2}} Txy + \kappa_6 Ly^{\frac{b-1}{2}} \right], \tag{32}$$

and optimizing the first two terms over  $y$  (and thus  $\eta$ ) gives  $y = \min \left\{ \left( \frac{4\beta\Delta}{abT^3 x^2} \right)^{\frac{2}{2+b}}, \frac{1}{Tx} \right\}$ .

Lemma 19 then gives

$$\mathbb{P} \left( \frac{1}{T} \sum_{t=1}^T \|\nabla f(x_t)\|^2 \geq x \right) \leq A + B + C + D, \tag{33}$$

where

$$\begin{aligned}
A &= \frac{4(2+b)\beta\Delta}{bTx} \\
B &= (2+b) \left( \frac{b}{2} \right)^{\frac{-b}{2+b}} x^{-1} (aTx)^{\frac{2}{2+b}} \left( \frac{2\beta\Delta}{T^2 x} \right)^{\frac{b}{2+b}} \\
C &= 2ac^{\frac{2-b}{2}} T \left( \frac{4\beta\Delta}{abT^3 x^2} \right)^{\frac{2}{2+b}} \\
D &= \frac{2\kappa_6 L}{x} \left( \frac{4\beta\Delta}{abT^3 x^2} \right)^{\frac{b-1}{2+b}}. \tag{34}
\end{aligned}$$

Using  $A + B + C + D \leq \max\{4A, 4B, 4C, 4D\}$  and bounding the previous term by  $\delta$ , we get, with probability  $1 - \delta$ ,

$$\frac{1}{T} \sum_{t=1}^T \|\nabla f(x_t)\|^2 \leq \frac{\kappa_2 \beta \Delta}{T \delta} + \frac{\kappa_3 \sqrt{\beta \Delta}}{T^{\frac{4-b}{4}} \delta^{\frac{2+b}{4}}} + \frac{\kappa_4 L^{\frac{2+b}{3b}} (\beta \Delta)^{\frac{b-1}{3b}}}{T^{\frac{b-1}{b}} \delta^{\frac{2+b}{3b}}} + \frac{\kappa_5 \sqrt{\beta \Delta}}{T^{\frac{b-1}{b}} \delta^{\frac{2+b}{2b}}}, \tag{35}$$

where

$$\begin{aligned}
\kappa_2 &= 16(2+b)/b && \leq 36 \\
\kappa_3 &= 2 \cdot 8^{\frac{2+b}{4}} c^{\frac{4-b^2}{8}} b^{-\frac{1}{2}} a^{\frac{b}{4}} && \leq 12c^{\frac{4-b^2}{8}} a^{\frac{b}{4}} \\
\kappa_4 &= 2^{\frac{5b+4}{3b}} \kappa_6^{\frac{2+b}{3b}} (ab)^{\frac{1-b}{3b}} && \leq 8\kappa_6^{\frac{2+b}{3b}} a^{\frac{1-b}{3b}} \\
\kappa_5 &= 2 \cdot (4 \cdot (2+b))^{\frac{2+b}{2b}} b^{-1/2} a^{1/b} && \leq 84a^{1/b} \\
\kappa_6 &= (1 - ac^{-b/2})^{-1} \left( c^{\frac{b}{2}} + \frac{4ab}{(b-1)(3-b)} \right) && \leq (1 - ac^{-b/2})^{-1} \left( c^{\frac{b}{2}} + \frac{8a}{b-1} \right)
\end{aligned} \tag{36}$$
